# Supplementary material for: Molecularly annotation of mouse avatar models derived from patients with colorectal cancer liver metastasis
Source: PubMed Central journal article supplement — Theranostics. 2019 May 25;9(12):3485–500. doi: 10.7150/thno.32033 (PMC6587174; doi:10.7150/thno.32033), 2019-05-25
Supplement: thnov09p3485s1.pdf [file thnov09p3485s1.pdf]

## **Molecularly Annotation of Mouse Avatar Models Derived From Patients With Colorectal Cancer Liver Metastasis**

Jingyuan Wang<sup>a,1</sup>, Baocai Xing<sup>b,1</sup>, Wei Liu<sup>b</sup>, Jian Li<sup>a</sup>, Xicheng Wang<sup>a</sup>, Juan Li<sup>b</sup>, Jing Yang<sup>a</sup>, Congcong Ji<sup>a</sup>, Zhongwu Li<sup>c</sup>, Bin Dong<sup>c</sup>, Jing Gao<sup>\*,a</sup>, Lin Shen<sup>\*,a</sup>

<sup>a</sup>Key laboratory of Carcinogenesis and Translational Research (Ministry of Education/Beijing), Department of Gastrointestinal Oncology, Peking University Cancer Hospital and Institute, 52 Fucheng Road, Haidian District, Beijing 100142, China.

<sup>b</sup>Key Laboratory of Carcinogenesis and Translational Research (Ministry of Education), Hepatopancreatobiliary Surgery Department I, Peking University Cancer Hospital and Institute, 52 Fucheng Road, Haidian District, Beijing 100142, China.

<sup>c</sup>Department of Pathology, Key Laboratory of Carcinogenesis and Translational Research (Ministry of Education/Beijing), Peking University Cancer Hospital and Institute, 52 Fucheng Road, Haidian District, Beijing 100142, China.

<sup>1</sup> These authors contributed equally to this work.

\*Corresponding authors:

Professor Lin Shen, 52 Fucheng Road, Haidian District, Beijing, 100142, China. Tel:

+86-10-88196561. Email: [shenlin@bjmu.edu.cn](mailto:shenlin@bjmu.edu.cn);

Professor Jing Gao, 52 Fucheng Road, Haidian District, Beijing, 100142, China. Tel:

+86-10-88196747. Email: [gaojing\\_pumc@163.com](mailto:gaojing_pumc@163.com).

## Supplementary figures

### Figure S1

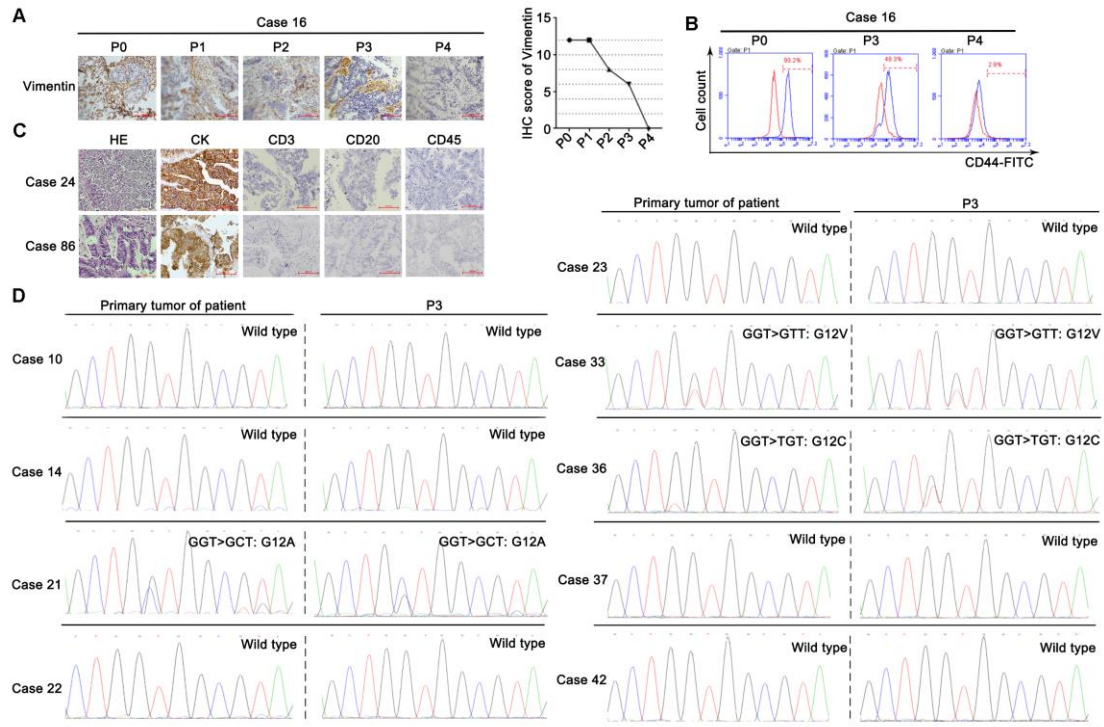

**Figure S1. The histopathological and molecular features of PDX models were evaluated during passage. (A)** The expression of human vimentin were decreased by IHC staining during passage. Quantification of IHC staining for human vimentin was shown right. **(B)** The expression of human CD44 of CAF cultured *in vitro* decreased by the flow cytometric analysis. **(C)** The histopathological features and leukocyte markers (human CD45, CD20, CD3), as well as human cancer cell marker (CK) were evaluated to confirm that no lymphoma transformation occurred. Positive staining was counted from five randomly selected areas in each slide at  $\times 400$  magnification. Scale bars = 100  $\mu$ m. **(D)** The mutational status of *KRAS* was compared between PDX models and parental tumors, validated by sanger sequencing. No discrepancies

between PDX models and parental tumors were observed in KRAS mutational types (Wild type, G12A, G12V, G12C).

**Figure S2**

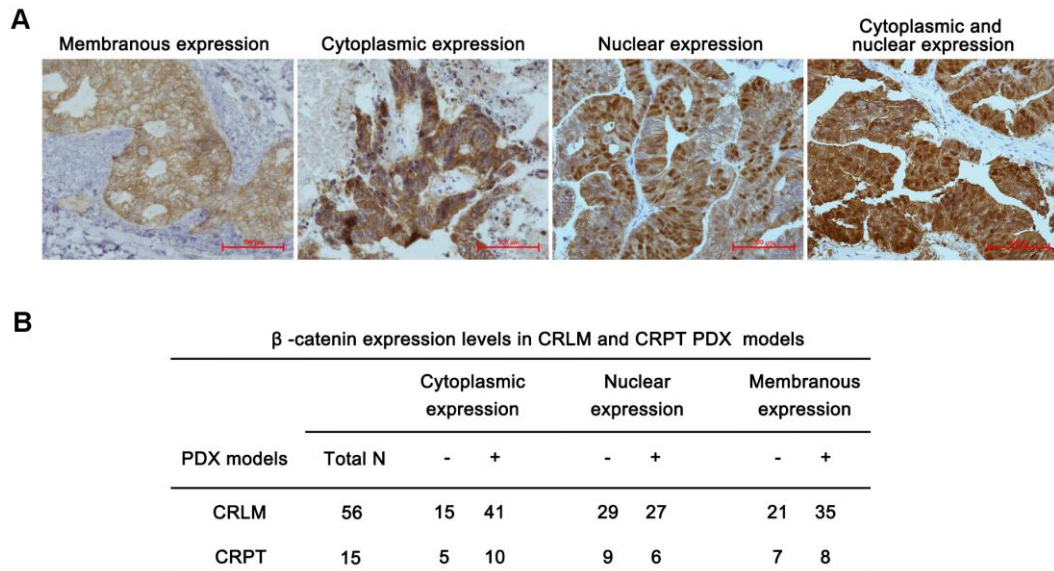

**Figure S2.** Immunohistochemical staining of  $\beta$ -catenin in CRLM and CRPT PDXs.

(A) Different staining patterns for  $\beta$ -catenin in PDXs: membranous expression, cytoplasmic expression, nuclear expression, nuclear and cytoplasmic  $\beta$ -catenin expression. (B) The summary of expression of  $\beta$ -catenin in CRLM and CRPT PDXs. Positive staining was counted from five randomly selected areas in each slide at  $\times 400$  magnification. Scale bars = 100  $\mu$ m.

**Figure S3**

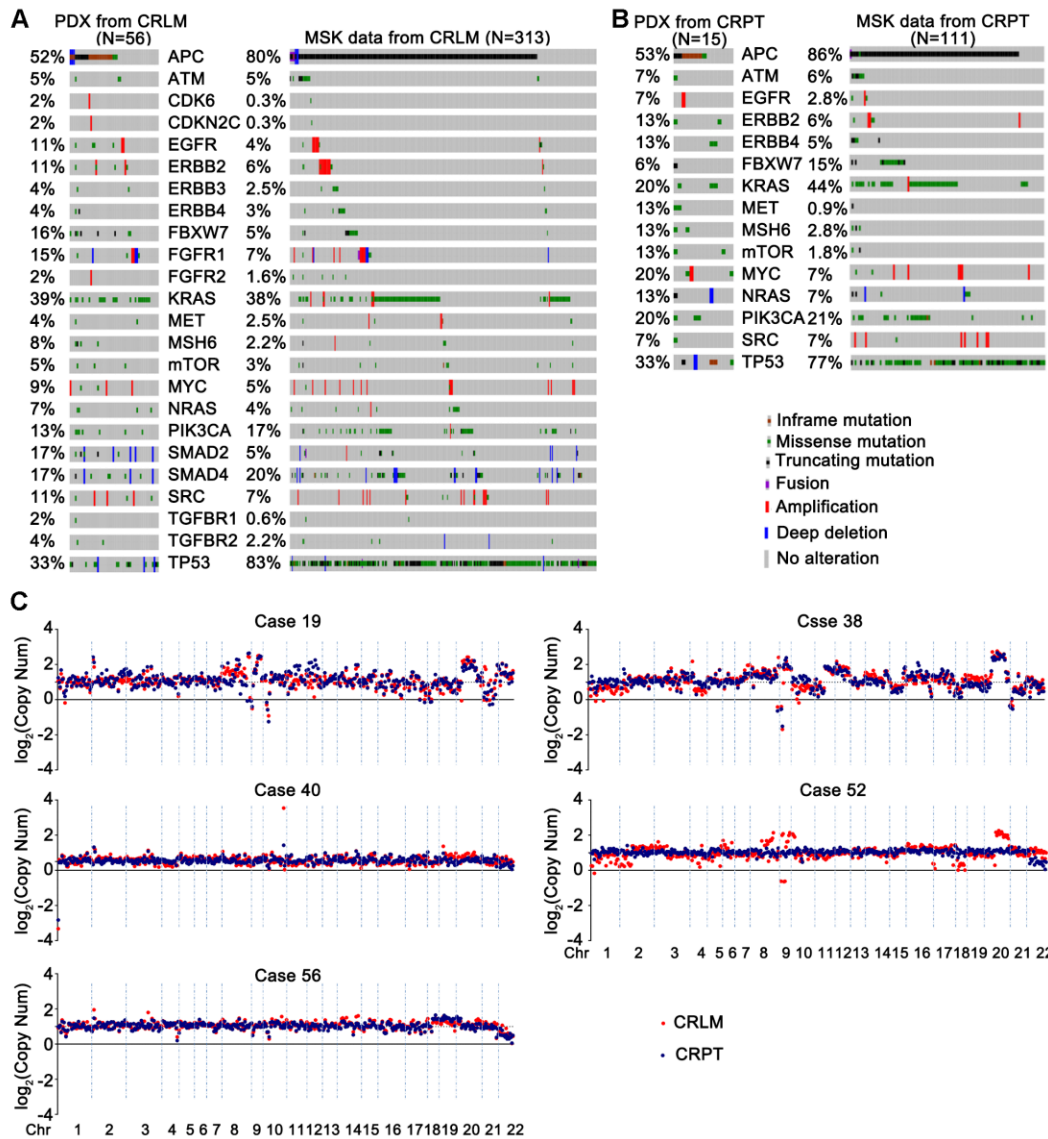

**Figure S3.** Comparison of genomic alterations in CRLM and CRPT PDXs. (A-B)

Genomic landscape analysis of genes altered in the PDX and MSK database from liver metastases (A) and primary tumors (B). Red, amplification; Black, truncating mutation; Maroon, inframe mutation; Green, missense mutation; Blue, deletion. (C) The copy numbers of five paired PDXs from patients with colorectal cancer liver metastases.

**Figure S4**

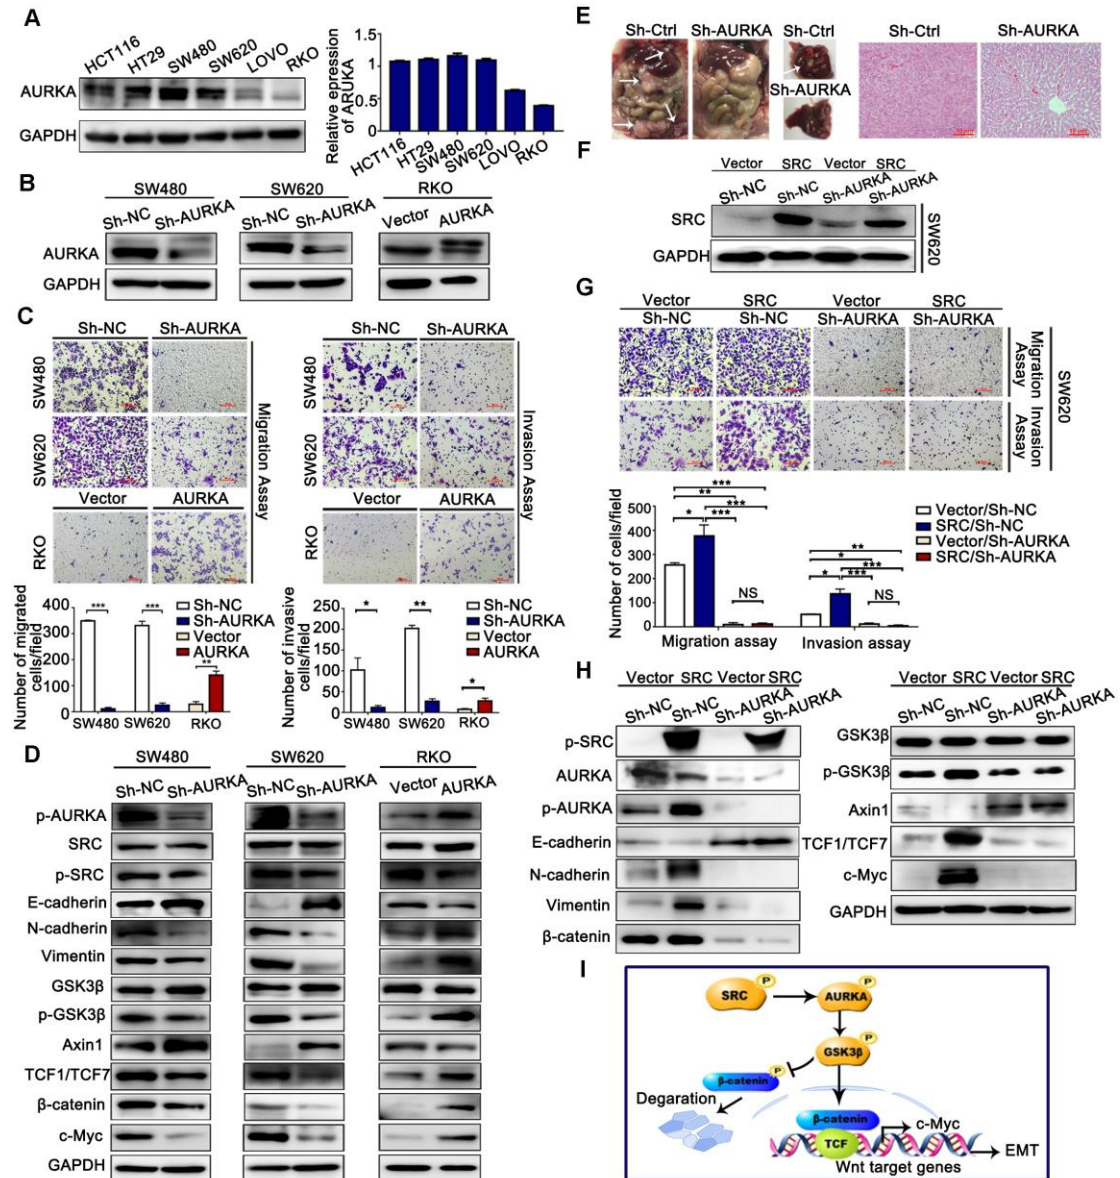

**Figure S4.** The role of AURKA and SRC in the metastasis of CRC cell lines. **(A)** AURKA expression in six CRC cell lines detected by western-blotting (Left). Images on right shows the protein expression levels of AURKA was quantified by the software Image J (Right). **(B)** Cells transfected with sh-AURKA and AURKA respectively, were detected using western-blotting. **(C)** AURKA suppressed cell migration and invasion detected by Transwell assays. Cells were seeded in upper chamber of insert and the migrated (Left)/invaded (Right) cells were examined after

12~24 h. Data represent the means  $\pm$  S.D. from three independent experiments.

Representative photos of stained cells are shown; scale bar, 100  $\mu$ m. **(D)** Key pathways related to the metastasis including EMT and wnt signaling pathway were examined by Western-blotting; **(E)** Intraperitoneal injection of SW620/NC and SW620/sh-AURKA cell lines respectively. The inhibition of AURKA decrease metastasis ability of SW620 *in vivo* (Left). Representative H&E stained liver sections containing metastatic foci (Right). Scale bars =10  $\mu$ m; Arrows: metastatic sites. **(F)** The SRC overexpression and relative control SW620 were incubated with or without AURKA specific shRNA (Sh-AURKA). **(G)** SRC enhanced cancer cell migration and invasion through increasing AURKA expression by Transwell assays. Data represent the means  $\pm$  S.D. from three independent experiments. Representative photos of stained cells are shown; scale bar, 100  $\mu$ m. **(H)** Inhibition of AURKA eliminated the SRC enhanced migration and invasion by suppressing SRC-induced wnt signaling pathway and EMT. **(I)** Mechanism diagram of the role of AURKA and SRC in the metastasis of CRC were showed.

**Figure S5**

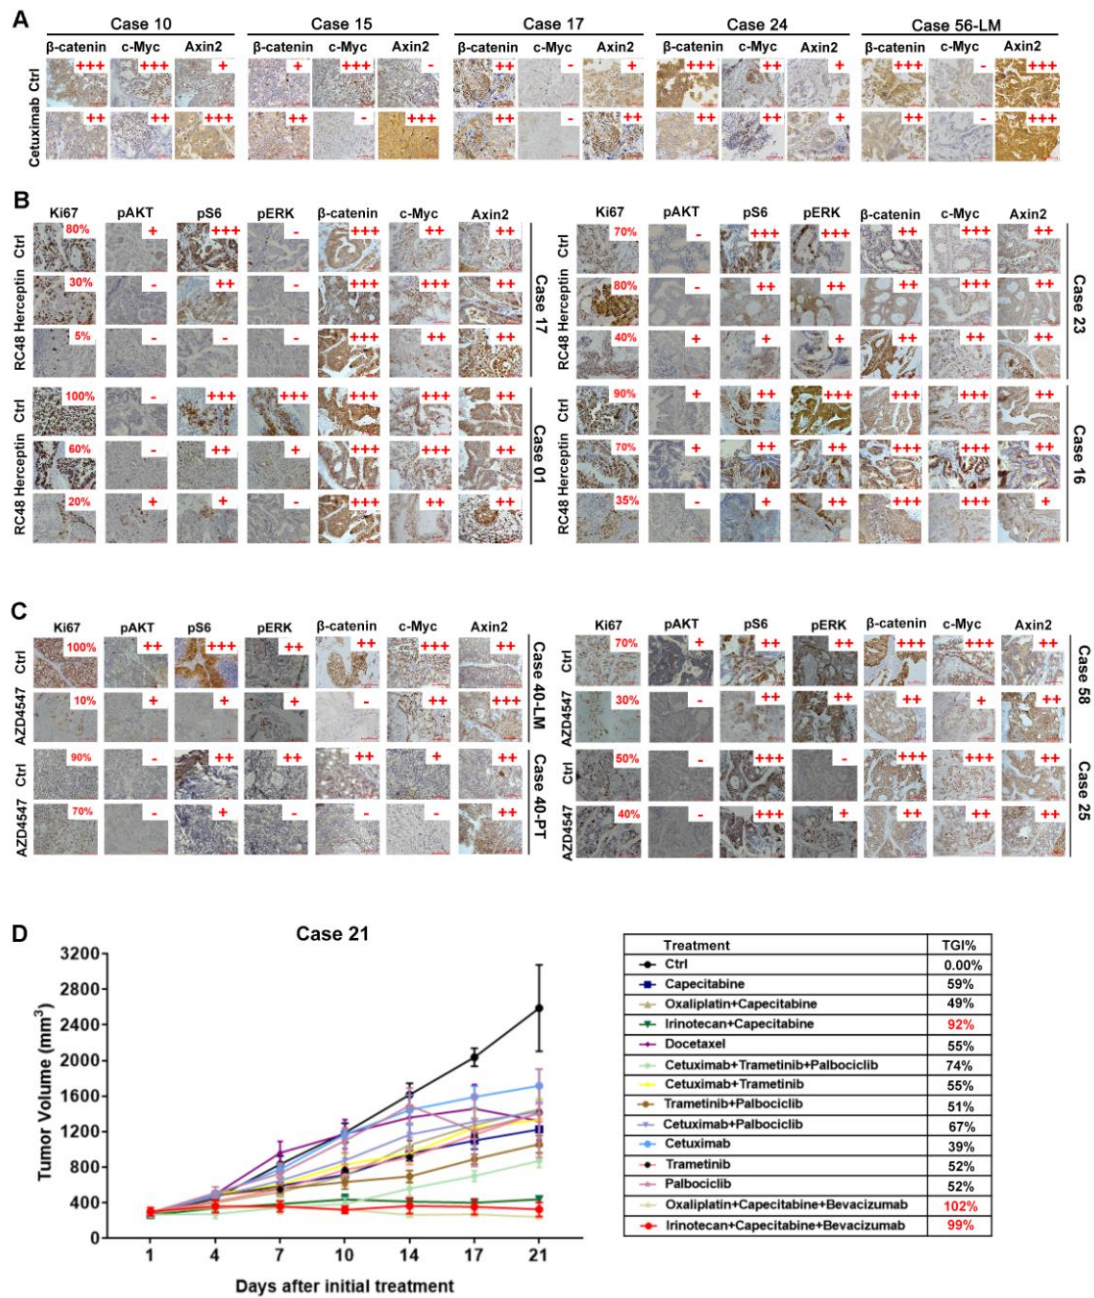

**Figure S5.** (A) Immunohistochemical staining of xenograft tumor tissues with the indicated antibodies in anti-EGFR therapy. Cetuximab exerted tumor suppression activity therapy via the decreased expression of c-Myc and increased expression of Axin2, while no significant change of  $\beta$ -catenin nuclear accumulation. (B)



Immunohistochemical staining of xenograft tumor tissues with the indicated antibodies in anti-HER2 therapy. The mechanism of anti-HER2 therapy by RC48 and Herceptin in CRLM PDXs, indicated by the inactivation of PI3K/AKT/mTOR and MAPK signaling pathways, instead of wnt signaling pathway. (C)

Immunohistochemical staining of xenograft tumor tissues with the indicated antibodies in anti-FGFR2 therapy. The mechanism of anti-FGFR2 therapy in CRLM PDXs by AZD4547, indicated by the inactivation of PI3K/AKT/mTOR and MAPK signaling pathways, instead of wnt signaling pathway. Representative images and quantification of the immunostaining of ki-67, p-AKT, p-S6, p-ERK, c-Myc, Axin 2 and  $\beta$ -catenin were shown. Positive staining was counted from five randomly selected areas in each slide at  $\times 400$  magnification. Scale bars = 100  $\mu$ m. (D) PDX with no druggable target was treated by a number of FDA approved drugs. Tumor volumes and proportion of tumor growth inhibition were expressed as means  $\pm$  S.D. The antitumor activity was depicted by % TGI.  $TGI = (1 - \Delta T / \Delta C) \times 100\%$ , ( $\Delta T$  = Tumor volume change of the drug-treated group,  $\Delta C$  = Tumor volume change of the control group on the final day of the study). Tumor volumes and proportion of tumor growth inhibition were expressed as means  $\pm$  S.D.

## Supplementary Tables

**Table S1. Patient characteristics and *in vivo* tumorigenicity of CRPT<sup>1</sup> PDXs.**

| ID         | Type of sample | Sex    | Age | Stage | Primary site <sup>2</sup> | Pathology <sup>3</sup> | <i>In vivo</i> Tumorigenicity <sup>4</sup> |
|------------|----------------|--------|-----|-------|---------------------------|------------------------|--------------------------------------------|
| Case 11-PT | Surgery        | Male   | 52  | IV    | Left side                 | Good                   | No                                         |
| Case 19-PT | Surgery        | Male   | 58  | IV    | Left side                 | Good                   | Yes                                        |
| Case 31-PT | Surgery        | Female | 48  | IV    | Left side                 | Good                   | Yes                                        |
| Case 33-PT | Surgery        | Female | 63  | IV    | Left side                 | Poor                   | No                                         |
| Case 38-PT | Surgery        | Male   | 53  | IV    | Left side                 | Good                   | Yes                                        |
| Case 40-PT | Surgery        | Male   | 38  | IV    | Left side                 | Good                   | Yes                                        |
| Case 46-PT | Surgery        | Female | 62  | IV    | Left side                 | Poor                   | No                                         |
| Case 47-PT | Surgery        | Female | 49  | IV    | Right side                | Good                   | No                                         |
| Case 49-PT | Surgery        | Female | 28  | IV    | Left side                 | Poor                   | No                                         |
| Case 51-PT | Surgery        | Male   | 54  | IV    | Left side                 | Good                   | No                                         |
| Case 52-PT | Surgery        | Male   | 71  | IV    | Left side                 | Good                   | Yes                                        |
| Case 56-PT | Surgery        | Male   | 28  | IV    | Left side                 | Good                   | Yes                                        |
| Case 78-PT | Surgery        | Male   | 65  | IV    | Left side                 | Good                   | Yes                                        |
| Case 81    | Biopsy         | Male   | 37  | IV    | Left side                 | Good                   | Yes                                        |
| Case 82    | Biopsy         | NA     | NA  | IV    | Left side                 | Good                   | No                                         |
| Case 83    | Biopsy         | Female | 73  | IV    | Left side                 | Good                   | Yes                                        |
| Case 84    | Biopsy         | NA     | NA  | IV    | Left side                 | Poor                   | Yes                                        |
| Case 85    | Biopsy         | Male   | 72  | IV    | Right side                | Good                   | Yes                                        |
| Case 86    | Biopsy         | Male   | 43  | IV    | Right side                | Good                   | Yes                                        |
| Case 87    | Biopsy         | Female | 60  | IV    | Right side                | Good                   | Yes                                        |
| Case 88    | Biopsy         | Female | 36  | IV    | Right side                | Good                   | Yes                                        |
| Case 89    | Biopsy         | Male   | 54  | IV    | Right side                | Poor                   | No                                         |
| Case 90    | Biopsy         | Male   | 31  | IV    | Left side                 | Poor                   | No                                         |
| Case 91    | Biopsy         | Female | 69  | IV    | Right side                | Poor                   | No                                         |
| Case 92    | Biopsy         | Female | 53  | IV    | Left side                 | Good                   | Yes                                        |
| Case 93    | Biopsy         | Male   | NA  | IV    | Right side                | Good                   | No                                         |

<sup>1</sup>CRPT: Colorectal cancer primary tumors.

<sup>2</sup>Left side of colorectum involved left colon and rectum.

<sup>3</sup>Good including well-differentiated and moderately differentiated adenocarcinoma, Poor including poor-differentiated adenocarcinoma, mucinous adenocarcinoma and signet ring cell carcinoma.

<sup>4</sup>*In vivo* tumorigenicity was defined as the successful establishment of P3.

**Table S3 The list of 483 genes**

|           |           |            |                       |                    |
|-----------|-----------|------------|-----------------------|--------------------|
| ABCB1     | CYP19A1   | HRAS       | PDK1                  | TNFRSF14           |
| ABCC1     | CYP1A1    | HSP90AA1   | PHF6                  | TNFRSF8            |
| ABCC2     | CYP1A2    | IDH1       | PHKA2                 | TNFSF11            |
| ABCC4     | CYP1B1    | IDH2       | PIGF                  | TNFSF13B           |
| ABCC6     | CYP2A6    | IGF1       | PIK3CA                | TOP1               |
| ABCG2     | CYP2B6    | IGF1R/IGFR | PIK3CB                | TP53               |
| ABL1      | CYP2C19   | IGF2       | PIK3CG                | TPMT               |
| ACK1/TNK2 | CYP2C8    | IGF2R      | PIK3R1                | TPX2               |
| ACVR1B    | CYP2C9    | IKBKB      | PIK3R2                | TRAIL-R1/TNFRSF10A |
| AKT1      | CYP2D6    | IKBKE      | PKC/PRRT2             | TRAIL-R2/TNFRSF10B |
| AKT2      | CYP2E1    | IKZF1      | PKC $\gamma$ /PRKCG   | TSC1               |
| AKT3      | CYP3A4    | IL7R       | PKC $\epsilon$ /PRKCE | TSC2               |
| ALK       | CYP3A5    | INHBA      | PLK1                  | TSHR               |
| AMER1     | CYP4B1    | INSR/IR    | PPARD                 | TYMS/TS            |
| APC       | DAXX      | IRF4       | PPP1R13L              | TYRO3              |
| AR        | DDR1      | IRS2       | PPP2R1A               | U2AF1              |
| ARAF      | DDR2      | ITK        | PRDM1                 | UBE2I              |
| ARFRP1    | DNMT1     | JAK1       | PRDX4                 | UGT1A1             |
| ARID1A    | DNMT3A    | JAK2       | PRKAA1                | UGT1A9             |
| ARID1B    | DOT1L     | JAK3       | PRKAR1A               | UGT2B15            |
| ARID2     | DPYD      | JUN        | PRKCA                 | UGT2B17            |
| ASXL1     | DSCAM     | KAT6A      | PRKCB                 | UGT2B7             |
| ATIC      | E2F1      | KDM5A      | PRKDC                 | UMPS               |
| ATM       | EGF       | KDM5C      | PTCH1                 | VEGFA              |
| ATP7A     | EGFL7     | KDM6A      | PTEN                  | VEGFB              |
| ATR       | EGFR      | KDR/VEGFR  | PTK2                  | VHL                |
| ATRX      | EGR1      | KEAP1      | PTPN11                | WEE1               |
| AURKA     | EMC8      | KIT        | PTPRD                 | WISP3              |
| AURKB     | EML4      | KLC3       | RAC2                  | WNK3               |
| AXIN1     | ENOSF1    | KLHL6      | RAD50                 | WT1                |
| AXL       | EP300     | KMT2A/MLL  | RAD51                 | XPC                |
| B2M       | EPH/EPHA1 | KMT2B/MLL4 | RAF1                  | XPO1               |
| BAIAP3    | EPHA2     | KMT2C/MLL3 | RARA                  | XRCC1              |
| BAP1      | EPHA3     | KMT2D/MLL2 | RB1                   | XRCC4              |
| BARD1     | EPHA4     | KRAS       | RET                   | YES1               |

|           |            |          |           |         |
|-----------|------------|----------|-----------|---------|
| BCL2      | EPHA5      | LCK      | RICTOR    | ZAP70   |
| BCL2L2    | EPHA7      | LIMK1    | RMDN2     | ZC3HAV1 |
| BCL6      | EPHA8      | LMO1     | RNF43     | ZNF217  |
| BCOR      | EPHB1      | LRP1B    | ROCK1     | ZNF703  |
| BCORL1    | EPHB2      | LRP2     | RON/MST1R |         |
| BCR       | EPHB3      | LYN      | ROS1      |         |
| BIRC5     | EPHX1      | MAP2K1   | RPL13     |         |
| BLK       | ERBB2/HER2 | MAP2K2   | RPS6KA1   |         |
| BLM       | ERBB3      | MAP2K4   | RPS6KB1   |         |
| BRAF      | ERBB4      | MAP3K1   | RPTOR     |         |
| BRCA1     | ERCC1      | MAP4K4   | RRM1      |         |
| BRCA2     | ERCC2      | MAP4K5   | RUNX1     |         |
| BRIP1     | ERG        | MAPK1    | SCF/KITLG |         |
| BRK/PTK6  | ESR1/ER    | MAPK10   | SDHA      |         |
| BSG/CD147 | ETV1       | MAPK14   | SDHAF1    |         |
| BTK       | ETV4       | MAPK8    | SDHAF2    |         |
| C11orf30  | ETV5       | MAPK9    | SDHB      |         |
| C18orf56  | ETV6       | MAPKAPK2 | SDHC      |         |
| C8orf34   | EWSR1      | MARK1    | SDHD      |         |
| CAMK2G    | EZH2       | MCL1     | SETD2     |         |
| CAMKK2    | FAM46C     | MDM2     | SF3B1     |         |
| CARD11    | FANCA      | MDM4     | SGK1      |         |
| CASP8     | FANCC      | MED12    | SHH       |         |
| CBFB      | FANCD2     | MEF2B    | SIK1      |         |
| CBL       | FANCE      | MEN1     | SKP2      |         |
| CBR1      | FANCF      | MERTK    | SLC10A2   |         |
| CBR3      | FANCG      | MET      | SLC15A2   |         |
| CCND1     | FANCL      | MITF     | SLC22A1   |         |
| CCND2     | FBXW7      | MKNK2    | SLC22A16  |         |
| CCND3     | FCGR3A     | MLH1     | SLC22A2   |         |
| CCNE1     | FGF10      | MPL      | SLC22A6   |         |
| CCR4      | FGF14      | MRE11A   | SLCO1B1   |         |
| CD19      | FGF19      | MS4A1    | SLCO1B3   |         |
| CD22      | FGF23      | MSH2     | SMAD2     |         |
| CD274     | FGF3       | MSH6     | SMAD4     |         |
| CD33      | FGF4       | MTDH     | SMARCA4   |         |
| CD38      | FGF6       | MTHFR    | SMARCB1   |         |
| CD3EAP    | FGFR1      | MTOR     | SMO       |         |
| CD52      | FGFR2      | MTRR     | SOCS1     |         |

|         |             |        |         |  |
|---------|-------------|--------|---------|--|
| CD74    | FGFR3       | MUTYH  | SOD2    |  |
| CD79A   | FGFR4       | MYC    | SOX10   |  |
| CD79B   | FGR         | MYCL1  | SOX2    |  |
| CDA     | FKBP1A      | MYCN   | SOX9    |  |
| CDC73   | FLT1        | MYD88  | SPEN    |  |
| CDH1    | FLT3        | NAT1   | SPG7    |  |
| CDK1    | FLT4        | NAT2   | SPOP    |  |
| CDK12   | FOXL2       | NCAM1  | SRC     |  |
| CDK2    | FRK         | NCF4   | SRD5A2  |  |
| CDK4    | FUBP1       | NCOA3  | SRMS    |  |
| CDK5    | FYN         | NCOR1  | STAG2   |  |
| CDK6    | FZD7        | NEK11  | STAT1   |  |
| CDK7    | GALNT14     | NF1    | STAT2   |  |
| CDK8    | GATA1       | NF2    | STAT3   |  |
| CDK9    | GATA2       | NFE2L2 | STAT4   |  |
| CDKN1B  | GATA3       | NFKBIA | STAT5A  |  |
| CDKN2A  | GCK         | NKX2-1 | STAT5B  |  |
| CDKN2B  | GID4        | NOS3   | STAT6   |  |
| CDKN2C  | GINS2       | NOTCH1 | STEAP1  |  |
| CEBPA   | GNA11       | NOTCH2 | STK11   |  |
| CHEK1   | GNA13       | NPM1   | STK3    |  |
| CHEK2   | GNAQ        | NQO1   | STK4    |  |
| CHST3   | GNAS        | NRAS   | SUFU    |  |
| CIC     | GPC3        | NTRK1  | SULT1A1 |  |
| CSNK1A1 | GPR124      | NTRK2  | SULT1A2 |  |
| COMT    | GRIN2A      | NTRK3  | SULT1C4 |  |
| CREBBP  | GSK3B       | NUP93  | SYK     |  |
| CRKL    | GSTM1       | PAK1   | TCF7L1  |  |
| CRLF2   | GSTM3       | PAK3   | TCF7L2  |  |
| CSF1R   | GSTP1       | PALB2  | TEK     |  |
| CSK     | GSTT1       | PARP1  | TET2    |  |
| CTCF    | H3F3A       | PARP2  | TGFBR1  |  |
| CTLA4   | HCK         | PAX5   | TGFBR2  |  |
| CTNNA1  | HGF         | PBRM1  | TK1     |  |
| CTNNB1  | HIF-1/HIF1A | PDCD1  | TMPRSS2 |  |
| CYBA    | HIST1H3B    | PDGFRA | TNF     |  |
| CYLD    | HNF1A       | PDGFRB | TNFAIP3 |  |

**Table S4. Clinicopathologic characteristics of CRLM PDX models and patients with CRLM from MSK data set (liver metastases).**

| Characteristics                       | Number of cases (%) |               | <i>P</i>     |
|---------------------------------------|---------------------|---------------|--------------|
|                                       | PDX (N = 56)        | MSK (N = 313) |              |
| <b>Age<sup>1</sup></b>                | 60 (25–78)          | 54 (24–86)    | <b>0.24</b>  |
| <b>Sex</b>                            |                     |               | <b>0.099</b> |
| Male                                  | 38 (67.9%)          | 172 (55.0%)   |              |
| Female                                | 18 (32.1%)          | 141 (45.0%)   |              |
| <b>Differentiation<sup>2</sup></b>    |                     |               | <b>0.298</b> |
| Good                                  | 46 (82.1%)          | 185 (59.2%)   |              |
| Poor                                  | 10 (17.9%)          | 24 (7.6%)     |              |
| NA <sup>3</sup>                       | /                   | 104 (33.2%)   |              |
| <b>Tumor site</b>                     |                     |               | <b>0.816</b> |
| Left side <sup>4</sup>                | 46 (82.1%)          | 244 (78.0%)   |              |
| Right side                            | 10 (17.9%)          | 62 (19.8%)    |              |
| NA                                    | /                   | 7 (2.2%)      |              |
| <b>Prior therapy</b>                  |                     |               | <b>0.108</b> |
| Neoadjuvant therapy                   | 48 (85.7%)          | 234 (74.9%)   |              |
| No neoadjuvant therapy                | 8 (14.3%)           | 79 (25.1%)    |              |
| <b>Time to metastasis<sup>5</sup></b> |                     |               | <b>0.118</b> |
| synchronous                           | 34 (60.7%)          | 225 (74.8%)   |              |
| metachronous                          | 22 (39.3%)          | 87 (27.8%)    |              |
| NA                                    | /                   | 1 (0.3%)      |              |
| <b>KRAS status</b>                    |                     |               | <b>1</b>     |
| Wild type                             | 35 (62%)            | 193 (62%)     |              |
| Mutation                              | 21 (38%)            | 120 (38%)     |              |
| <b>MSI status</b>                     |                     |               | <b>1</b>     |
| MSI                                   | 1 (1.8%)            | 5 (1.6%)      |              |
| MSS                                   | 55 (98.2%)          | 194 (62.0%)   |              |
| NA                                    | /                   | 114 (36.4%)   |              |

<sup>1</sup>Median (range); <sup>2</sup>Good including well-differentiated and moderately differentiated adenocarcinoma, Poor including poor-differentiated adenocarcinoma and mucinous adenocarcinoma.

<sup>3</sup>NA: not applicable; <sup>4</sup>Left side of colorectum involved left colon and rectum. <sup>5</sup>Synchronous liver metastasis was defined as liver metastatic lesions diagnosed before or within 6 months of the primary CRC diagnosis. All others were considered metachronous Liver metastasis. *P* was calculated by chi-square test, unpaired two-tailed t-test or one-way analysis of variance separately.

**Table S5. Clinicopathologic characteristics of CRPT PDX models and patients with CRLM from MSK data set (primary tissues).**

| Characteristics                    | Number of cases (%) |               | <i>P</i>     |
|------------------------------------|---------------------|---------------|--------------|
|                                    | PDX (N = 15)        | MSK (N = 111) |              |
| <b>Age<sup>1</sup></b>             | 40 (36-73)          | 54 (29–70)    | <b>0.099</b> |
| <b>Sex</b>                         |                     |               | <b>0.062</b> |
| Male                               | 9 (60.0%)           | 54 (48.6%)    |              |
| Female                             | 5 (33.3%)           | 57 (51.4%)    |              |
| NA <sup>2</sup>                    | 1 (6.7%)            | /             |              |
| <b>Differentiation<sup>3</sup></b> |                     |               | <b>0.233</b> |
| Good                               | 14 (93.3%)          | 82 (73.9%)    |              |
| Poor                               | 1 (6.7%)            | 19 (17.1%)    |              |
| NA                                 | /                   | 10 (9.0%)     |              |
| <b>Tumor site</b>                  |                     |               | <b>0.922</b> |
| Left side <sup>4</sup>             | 11 (73.3%)          | 80 (72.1%)    |              |
| Right side                         | 4 (26.7%)           | 30 (27.0%)    |              |
| NA                                 | /                   | 1 (1.0%)      |              |

<sup>1</sup>Median (range); <sup>2</sup>NA: not applicable; <sup>3</sup>Good including well-differentiated and moderately differentiated adenocarcinoma, Poor including poor-differentiated adenocarcinoma and mucinous adenocarcinoma. <sup>4</sup>Left side of colorectum involved left colon and rectum; *P* was calculated by chi-square test, unpaired two-tailed t-test or one-way analysis of variance separately.

**Table S6. The distribution of Q20 and Q30 in CRLM/PT PDX.**

| Sample ID  | Effective Error rate(%) | Error rate(%) | Q20 (%) | Q30 (%) | GC content(%) | AT separation | GC separation |
|------------|-------------------------|---------------|---------|---------|---------------|---------------|---------------|
| Case 01    | 95.69                   | 0.03          | 95.8    | 90.25   | 49.73         | 0.05          | 0.02          |
| Case 03    | 95.4                    | 0.03          | 95.92   | 90.57   | 49.89         | 0.01          | 0.03          |
| Case 05    | 94.85                   | 0.04          | 95.98   | 90.34   | 49.61         | 0.08          | 0.02          |
| Case 07    | 94.15                   | 0.03          | 95.89   | 90.44   | 49.89         | 0.01          | 0.04          |
| Case 10 P0 | 98.31                   | 0.03          | 95.77   | 90.13   | 49.47         | 0.14          | 0.02          |
| Case 10 P1 | 97.76                   | 0.03          | 95.96   | 90.57   | 49.77         | 0.11          | 0.01          |
| Case 10 P2 | 97.12                   | 0.03          | 95.9    | 90.42   | 49.44         | 0.08          | 0.03          |
| Case 10 P3 | 93.13                   | 0.04          | 95.76   | 90.16   | 50.2          | 0.05          | 0.1           |
| Case 11 P3 | 95.82                   | 0.03          | 95.69   | 90.1    | 49.86         | 0.03          | 0.03          |
| Case 12    | 99.19                   | 0.03          | 96.58   | 91.78   | 49.59         | 0.26          | 0.06          |
| Case 13    | 94.6                    | 0.03          | 95.83   | 90.09   | 48.66         | 0.09          | 0.01          |
| Case 14 P0 | 96.8                    | 0.03          | 95.66   | 89.85   | 49.42         | 0.11          | 0.01          |
| Case 14 P1 | 97.61                   | 0.03          | 95.88   | 90.38   | 49.61         | 0.15          | 0.02          |
| Case 14 P2 | 98.48                   | 0.03          | 95.73   | 90.11   | 49.11         | 0.15          | 0.01          |
| Case 14 P3 | 96.71                   | 0.03          | 95.77   | 90.28   | 49.91         | 0.11          | 0             |
| Case 15    | 99.21                   | 0.03          | 97.14   | 92.83   | 49.12         | 0.29          | 0.22          |
| Case 16    | 96.32                   | 0.03          | 95.67   | 89.88   | 50.02         | 0.11          | 0.04          |
| Case 17    | 98.15                   | 0.03          | 95.62   | 89.77   | 49.49         | 0.11          | 0.01          |
| Case 18    | 97.35                   | 0.03          | 95.69   | 89.84   | 49.15         | 0.15          | 0.01          |
| Case 19-LM | 99.01                   | 0.03          | 96.84   | 92.72   | 46.17         | 0.17          | 0.2           |
| Case 19-PT | 98.78                   | 0.03          | 96.89   | 92.53   | 46.2          | 0.12          | 0.1           |
| Case 21 P0 | 99.44                   | 0.03          | 97.31   | 93.28   | 45.11         | 0.23          | 0.14          |
| Case 21 P1 | 97.99                   | 0.02          | 97.5    | 93.66   | 46.36         | 0.17          | 0.13          |
| Case 21 P2 | 95.48                   | 0.02          | 97.7    | 94.06   | 47.91         | 0.09          | 0.13          |
| Case 21 P3 | 95.93                   | 0.02          | 97.91   | 94.91   | 50.93         | 0.03          | 0.11          |
| Case 22 P0 | 99.46                   | 0.03          | 97.31   | 93.28   | 45.59         | 0.21          | 0.14          |
| Case 22 P1 | 99.07                   | 0.03          | 97.4    | 93.5    | 45.64         | 0.22          | 0.17          |
| Case 22 P2 | 99.62                   | 0.03          | 97.21   | 93.08   | 45.66         | 0.24          | 0.16          |
| Case 22 P3 | 97                      | 0.03          | 97.38   | 93.41   | 50.53         | 0.17          | 0.22          |
| Case 23 P0 | 97.65                   | 0.03          | 95.62   | 89.82   | 49.11         | 0.14          | 0.05          |
| Case 23 P1 | 92.05                   | 0.04          | 95.58   | 89.8    | 50.19         | 0.08          | 0.07          |
| Case 23 P2 | 93.35                   | 0.03          | 95.76   | 90.2    | 49.13         | 0.05          | 0.07          |
| Case 23 P3 | 93.82                   | 0.03          | 95.53   | 89.71   | 49.35         | 0.02          | 0.06          |
| Case 24    | 96.68                   | 0.03          | 95.55   | 89.63   | 49.7          | 0.08          | 0             |
| Case 25    | 97.76                   | 0.03          | 96.79   | 91.94   | 49.84         | 0.18          | 0.13          |
| Case 27    | 98.78                   | 0.02          | 97.48   | 93.73   | 50.77         | 0.26          | 0.28          |
| Case 28    | 95.32                   | 0.02          | 97.77   | 94.3    | 51.2          | 0.08          | 0.15          |



|            |       |      |       |       |       |      |      |
|------------|-------|------|-------|-------|-------|------|------|
| Case 29    | 98.48 | 0.02 | 97.63 | 94.32 | 50.75 | 0.15 | 0.08 |
| Case 30    | 94.73 | 0.02 | 97.09 | 92.71 | 52.79 | 0.02 | 0.1  |
| Case 33 P0 | 99.53 | 0.03 | 97.42 | 93.51 | 45.79 | 0.23 | 0.18 |
| Case 33 P1 | 99.51 | 0.02 | 97.5  | 93.69 | 45.7  | 0.19 | 0.14 |
| Case 33 P2 | 98.65 | 0.02 | 97.62 | 93.88 | 46.95 | 0.17 | 0.18 |
| Case 33 P3 | 98.65 | 0.03 | 96.91 | 92.26 | 50.2  | 0.23 | 0.17 |
| Case 35    | 97.88 | 0.03 | 97.32 | 93.23 | 50.28 | 0.21 | 0.24 |
| Case 36 P0 | 98.69 | 0.03 | 96.89 | 92.47 | 45.92 | 0.13 | 0.12 |
| Case 36 P1 | 98.62 | 0.03 | 96.62 | 91.95 | 45.83 | 0.16 | 0.13 |
| Case 36 P2 | 98.07 | 0.03 | 96.72 | 92.18 | 45.72 | 0.1  | 0.08 |
| Case 36 P3 | 98.77 | 0.03 | 97.36 | 93.35 | 49.59 | 0.23 | 0.2  |
| Case 37 P0 | 97.96 | 0.03 | 96.79 | 92.28 | 46.25 | 0.11 | 0.09 |
| Case 37 P1 | 98.35 | 0.03 | 96.75 | 92.22 | 46.52 | 0.16 | 0.13 |
| Case 37 P2 | 98.78 | 0.03 | 96.89 | 92.53 | 46.2  | 0.12 | 0.1  |
| Case 37 P3 | 98.59 | 0.03 | 96.75 | 91.84 | 49.9  | 0.19 | 0.11 |
| Case 38-LM | 96.05 | 0.02 | 97.61 | 94.23 | 48.81 | 0.06 | 0.12 |
| Case 38-PT | 93.57 | 0.02 | 97.74 | 94.56 | 48.47 | 0.02 | 0.07 |
| Case 40-LM | 98.47 | 0.02 | 97.93 | 94.87 | 49.55 | 0.22 | 0.29 |
| Case 40-PT | 99.25 | 0.02 | 97.64 | 94.38 | 49.97 | 0.15 | 0.13 |
| Case 41    | 98.97 | 0.02 | 98.36 | 95.88 | 47.61 | 0.16 | 0.19 |
| Case 42 P0 | 98.79 | 0.02 | 98.22 | 95.58 | 46.44 | 0.2  | 0.3  |
| Case 42 P1 | 99.41 | 0.02 | 97.99 | 95.11 | 45.59 | 0.15 | 0.25 |
| Case 42 P2 | 99.53 | 0.02 | 98.06 | 95.27 | 45.63 | 0.2  | 0.27 |
| Case 42 P3 | 99.07 | 0.03 | 96.66 | 91.68 | 50.1  | 0.2  | 0.09 |
| Case 45    | 97.47 | 0.03 | 96.82 | 91.95 | 50.34 | 0.13 | 0.11 |
| Case 48    | 97.5  | 0.02 | 97.88 | 94.78 | 50.14 | 0.06 | 0.1  |
| Case 49    | 96.61 | 0.03 | 96.69 | 91.83 | 51.19 | 0.08 | 0.1  |
| Case 50    | 98.37 | 0.03 | 96.69 | 91.73 | 49.6  | 0.23 | 0.12 |
| Case 52-LM | 97.81 | 0.03 | 96.85 | 91.97 | 50.78 | 0.17 | 0.14 |
| Case 52-PT | 98.66 | 0.03 | 96.09 | 90.69 | 51.69 | 0.15 | 0.07 |
| Case 53    | 98.91 | 0.02 | 97.64 | 94.31 | 49.91 | 0.18 | 0.16 |
| Case 54    | 98.22 | 0.03 | 97.03 | 92.62 | 50.08 | 0.16 | 0.09 |
| Case 55    | 98.5  | 0.02 | 97.87 | 94.74 | 50.19 | 0.14 | 0.14 |
| Case 56-LM | 98.99 | 0.03 | 96.77 | 92.15 | 49.76 | 0.22 | 0.08 |
| Case 56-PT | 98.73 | 0.03 | 96.81 | 92.2  | 50.04 | 0.2  | 0.09 |
| Case 58    | 98.87 | 0.02 | 97.78 | 94.57 | 50.22 | 0.15 | 0.13 |
| Case 59    | 98.06 | 0.02 | 97.29 | 93.33 | 50.95 | 0.2  | 0.23 |
| Case 61    | 99.01 | 0.02 | 97.44 | 93.65 | 50.3  | 0.24 | 0.25 |
| Case 62    | 97.07 | 0.03 | 97.38 | 93.27 | 50.27 | 0.1  | 0.08 |
| Case 63    | 98.97 | 0.02 | 97.41 | 93.58 | 49.78 | 0.25 | 0.23 |

|            |       |      |       |       |       |      |      |
|------------|-------|------|-------|-------|-------|------|------|
| Case 65    | 96.35 | 0.02 | 97.63 | 94.03 | 51.36 | 0.16 | 0.21 |
| Case 66    | 98.23 | 0.02 | 97.42 | 93.6  | 51    | 0.2  | 0.23 |
| Case 68    | 97.44 | 0.02 | 97.54 | 93.84 | 50.89 | 0.19 | 0.22 |
| Case 69    | 98.45 | 0.02 | 97.38 | 93.55 | 50.69 | 0.22 | 0.21 |
| Case 70    | 98.14 | 0.02 | 98.4  | 95.97 | 47.59 | 0.16 | 0.22 |
| Case 71    | 98.21 | 0.02 | 97.83 | 94.64 | 48.87 | 0.16 | 0.19 |
| Case 72    | 98.77 | 0.02 | 97.55 | 94.12 | 50.14 | 0.19 | 0.1  |
| Case 74    | 98.88 | 0.03 | 97.24 | 93.53 | 47.65 | 0.19 | 0.18 |
| Case 77    | 98.67 | 0.03 | 97.33 | 93.66 | 50.78 | 0.16 | 0.06 |
| Case 79    | 97.78 | 0.03 | 97.23 | 92.72 | 51.34 | 0.15 | 0.15 |
| Case 80    | 99.33 | 0.02 | 98.18 | 95.52 | 47.61 | 0.21 | 0.22 |
| Case 31-PT | 99.28 | 0.02 | 97.74 | 94.27 | 45.72 | 0.16 | 0.22 |
| Case 78-PT | 99.57 | 0.02 | 97.4  | 93.6  | 45.28 | 0.16 | 0.21 |
| Case 81    | 98.81 | 0.02 | 97.82 | 94.39 | 46.74 | 0.07 | 0.2  |
| Case 83    | 99.28 | 0.02 | 97.45 | 93.66 | 46.48 | 0.16 | 0.25 |
| Case 84    | 99.48 | 0.02 | 97.53 | 93.84 | 46.29 | 0.17 | 0.27 |
| Case 85    | 99.2  | 0.02 | 97.53 | 93.81 | 46.91 | 0.17 | 0.27 |
| Case 86    | 96.76 | 0.02 | 97.75 | 94.29 | 46.56 | 0.11 | 0.22 |
| Case 87    | 99.01 | 0.02 | 97.65 | 94.06 | 46.94 | 0.13 | 0.26 |
| Case 88    | 98.78 | 0.02 | 97.6  | 93.99 | 46.89 | 0.11 | 0.25 |
| Case 92    | 99.49 | 0.03 | 97.36 | 93.38 | 45.47 | 0.24 | 0.18 |

---

## **Supplementary Methods**

### **Antibodies**

The following antibodies were purchased from Cell Signaling Technology (Boston, Massachusetts, USA): p-AKT (#4060), p-S6 (#4858), p-ERK (#2947), HER2 (#4290), FGFR2 (#23328), EGFR (#2085), MET (#8198), p-AURKA (#2914), SRC (#2109), p-SRC (#6943), Vimentin (#5741), E-cadherin (#14472), N-cadherin (#13116),  $\beta$ -catenin (#8480), GSK-3 $\beta$  (#12456), p-GSK-3 $\beta$  (#5558), Axin1 (#2074), TCF1/TCF7 (#2203), GAPDH (#5174); The Ki-67 antibody (#ZM-0167), CD3 (#ZM-0417), CD45 (#13917) and CK (#ZM-0069) were purchased from ZSGB-BIO (Beijing, China); Human vimentin (#790-2917) was purchased from Ventana (Tucson, AZ, USA); AURKA (#ab13824), CD20 (#ab78237), Axin2 (#ab32197) and c-Myc (#ab32072) were purchased from abcam (Cambridge, UK); CD44-FITC (#11-0441-81) and IgG1-FITC (#11-4714-81) was purchased from eBioscience (Vienna, Austria).

### **Administration methods of all the drugs for tumor xenograft studies**

The doses of drug used for PDX models were given as followed: RC-48 (RemeGen, Ltd., Yantai, Shandong, China), 5 mg/kg once a week by intravenous injection; Herceptin (Hoffman-La Roche Ltd, Basel, Switzerland), 10 mg/kg once a week by intravenous injection; Cetuximab (Merck KGaA, Darmstadt, Germany), 5 mg/kg twice a week by intraperitoneal injection; AZD4547 (Selleck Chemicals, Houston, TX, USA), 12.5 mg/kg daily by oral gavage; 5-Fluorouracil (Tianjin Jinyao Amino Acid Co., Ltd, Tianjin, China), 10 mg/Kg twice a week by intraperitoneal

injection; Irinotecan (Jiangsu Hengrui Medicine Co., Ltd, Jiangsu, China), 20 mg/kg twice a week by intraperitoneal injection; Leucovorin (Nanjing Chia Tai-Tian Qing Pharmaceutical Co., Ltd, Jiangsu, China), 20 mg/kg twice a week by intravenous injection; Capecitabine (F. Hoffmann-La Roche Co., Ltd, Basel, Switzerland), 180 mg/kg daily by oral gavage; Oxaliplatin (Sanofi Genzyme, Cambridge, MA, USA), 5 mg/kg twice a week by intraperitoneal injection; Bevacizumab (F. Hoffmann-La Roche Co., Ltd, Basel, Switzerland), 5 mg/kg twice a week by intraperitoneal injection.

### **Gene variant calling and data analysis**

The clean reads of all samples were outputted finally with Q20 >90% and Q30 >85% (Table S6), after cleaning the sequencing adapters and low-quality reads. Then, these reads were matched to the human reference hg19 genome using the Burrows-Wheeler Aligner (BWA) [1]. The original BAM files were sorted using sambamba and remove duplicate reads using samblaster [2, 3]. According to the results of the alignment, the coverage of the target region was over 99%, and the mapping rate was >95%. The variants were called using muTect and VarScan2, for SNP and indel mutations respectively [4, 5]. CNV analysis was performed by ExomeCNV. A neutral copy number for each exon for each gene was established using normal lymphocyte samples. Then, they were functionally annotated with Annovar software. ANNOVAR with information from the COSMIC (<http://cancer.sanger.ac.uk/cosmic>) and ClinVar (<https://www.ncbi.nlm.nih.gov/clinvar/>) databases was used for functional annotation of variants [6]. The subsequent filter to identify the candidate genetic alterations as

follows: 1) Retain the variations in the exonic or splicing region, which are more likely to affect the protein function. 2) Remove the SNPs of the single-base repeat region to avoid errors. 3) Remove the mutation sites: depth $\leq$ 4, mutation abundance $\leq$ 5% (Avoid false positive due to noise generated by low depth). 4) Remove germline mutations (SAO=1) in SAOdbSNP147, and variant with mutant allele frequency (MAF)  $>0.005$  in the 1,000 Genomes database and the Exome Aggregation Consortium. 5) Remove synonymous mutations. 6) Retain the nonsynonymous SNVs and indels if the functional predictions by SIFT and Polyphen2, which might indicate the alterations are not benign. Genes with high frequency were selectively validated by Sanger sequencing to confirm the mutation (data not shown).

### **Plasmid construction/transfection**

pcDNA3.1 plasmids expressing His-tagged AURKA and SRC were provided by ViGene Biosciences (Rockville, MD, USA). Plasmids were transfected into cells with Lipofectamine 3000. Lentiviral systems for knockdown of AURKA were provided by GenePharma (Suzhou, China) and were infected into cells following the provider's instructions. Interference sequences used were shown as followed:

Control: 5'-TTCTCCGAACGTGTCACGT-3';

AURKA:5'-GGTCTTGTGTCCTTCAAATTC-3';

### **Transwell assays**

Cell migration and invasion assays were performed in 24-well CIM plates with or without Matrigel Basement Membrane Matrix (BD Biosciences) as described

previously [7]. The number of cells permeating septum was counted in five random microscopic fields. The average number of cells in five fields was calculated, which represented the ability of cells to migrate and invade. All values are represented as means  $\pm$  S.D.

### **Cancer-associated fibroblast (CAF) culture**

The tumor specimens were obtained from patients with CRLM or PDX models. The fresh tumor specimens were cut into 1-mm<sup>3</sup> -sized pieces and cultured in high glucose (H-DMEM) supplemented with 15% FBS and 1% penicillin and streptomycin. The medium was replaced every 3 days after the initial plating. When adherent fibroblast-like cells appeared, the cells were collected for flow cytometry. CAFs were stained with monoclonal antibodies against CD44 (FITC-conjugated). FITC-IgG1 were used as the isotype control.

### **Western-blotting**

The extraction of total protein from cell pellets was performed as previously described [7]. Proteins were visualized using ECL plus Western Blotting Detection Reagents (GE Healthcare). The protein expressions were quantified and normalized by Image J software.

### ***In vivo* metastasis assay**

SW620/sh AURKA and SW620/sh-NC cell lines ( $5 \times 10^6$  in 100  $\mu$ L PBS) were injected intraperitoneally into 6-week-old female NOD/SCID mice (N = 5 mice/group), and on the indicated day, the mice were killed and photographed. All the liver tissues were embedded in paraffin, followed by HE and IHC staining. All animal

experiments were performed according to the animal experimental guidelines of Peking University Cancer Hospital.

**References:**

1. Li H, Durbin R. Fast and accurate long-read alignment with Burrows-Wheeler transform. *Bioinformatics*. 2010; 26: 589-95.
2. Faust GG, Hall IM. SAMBLASTER: fast duplicate marking and structural variant read extraction. *Bioinformatics*. 2014; 30: 2503-5.
3. Li H, Handsaker B, Wysoker A, Fennell T, Ruan J, Homer N, et al. The Sequence Alignment/Map format and SAMtools. *Bioinformatics*. 2009; 25: 2078-9.
4. Cibulskis K, Lawrence MS, Carter SL, Sivachenko A, Jaffe D, Sougnez C, et al. Sensitive detection of somatic point mutations in impure and heterogeneous cancer samples. *Nat Biotechnol*. 2013; 31: 213-9.
5. Koboldt DC, Zhang Q, Larson DE, Shen D, McLellan MD, Lin L, et al. VarScan 2: somatic mutation and copy number alteration discovery in cancer by exome sequencing. *Genome Res*. 2012; 22: 568-76.
6. Wang K, Li M, Hakonarson H. ANNOVAR: functional annotation of genetic variants from high-throughput sequencing data. *Nucleic Acids Res*. 2010; 38: e164.
7. Wang J, Liu Z, Wang Z, Wang S, Chen Z, Li Z, et al. Targeting c-Myc: JQ1 as a promising option for c-Myc-amplified esophageal squamous cell carcinoma. *Cancer Lett*. 2018; 419: 64-74.
